# Supplementary material
Source: PubMed Central journal article supplement (PMC3982690)
Supplement: 3fac2f5b4b35bdb15cc87f76388605f6_genetics.113.158295-2.pdf [file 3fac2f5b4b35bdb15cc87f76388605f6_genetics.113.158295-2.pdf]

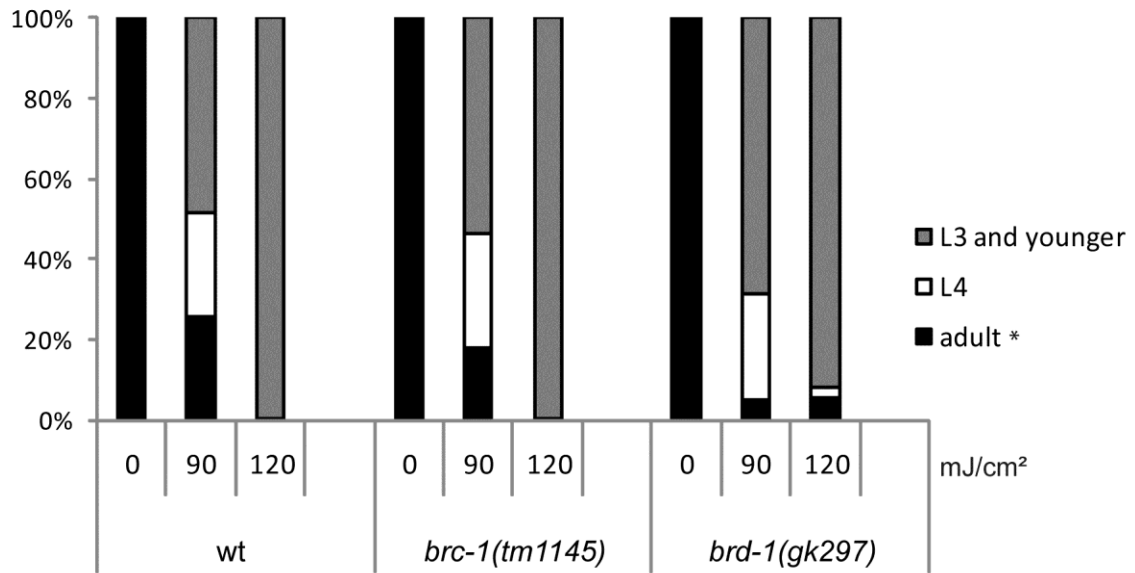

\* All adults had normally developed germline.

**Figure S8** *C. elegans* with disrupted BRC-1/BRD-1 complex are as sensitive to UVB irradiation as wild-type worms. Percentage of larval stages 72h after UVB irradiation at L1 larval stage of the indicated genotypes.
