# Supplementary material
Source: PubMed Central journal article supplement (PMC3982690)
Supplement: 8c3bac4bc8320a884a074d2eed04ebb3_genetics.113.158295-5.pdf [file 8c3bac4bc8320a884a074d2eed04ebb3_genetics.113.158295-5.pdf]

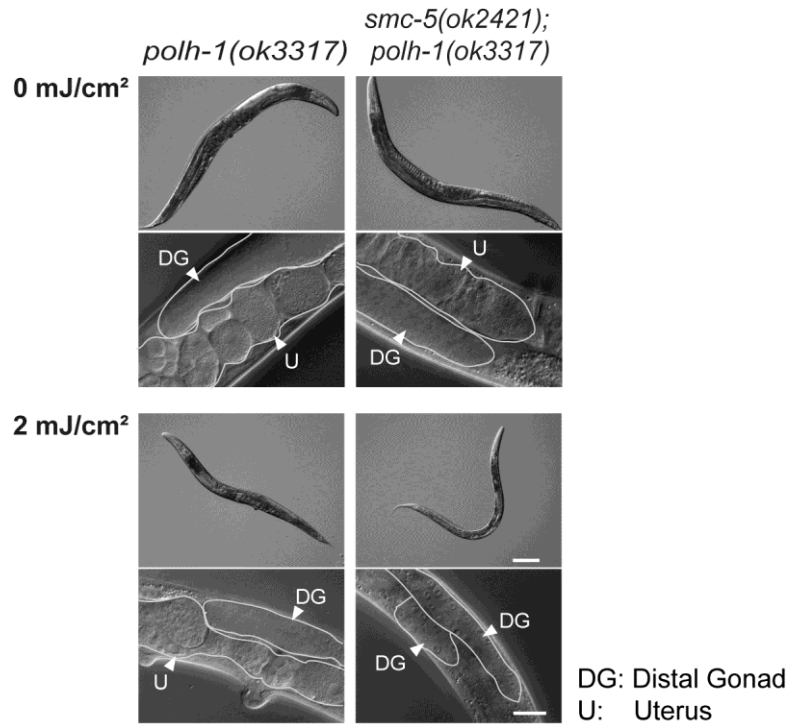

**Figure S6 *smc-5;polh-1* double mutants are impaired in somatic tissues and germline after UVB irradiation.**

DIC images of whole worms and magnified view of mid-body 72h after L1 stage. Synchronized worms were irradiated at L1 larval stage and maintained at 20 °C. Scale bar = 100  $\mu$ m (upper panels) and 20  $\mu$ m (lower panels). Shown are *polh-1(ok3317)* and *polh-1(ok3317);smc-5(ok2421)* mutant strains that were treated and analyzed in parallel to worms depicted in Figure 4.
