# Supplementary material
Source: PubMed Central journal article supplement (PMC3982690)
Supplement: 21abb45e5e8ad5232990fda5e1fc4b32_genetics.113.158295-1.pdf [file 21abb45e5e8ad5232990fda5e1fc4b32_genetics.113.158295-1.pdf]

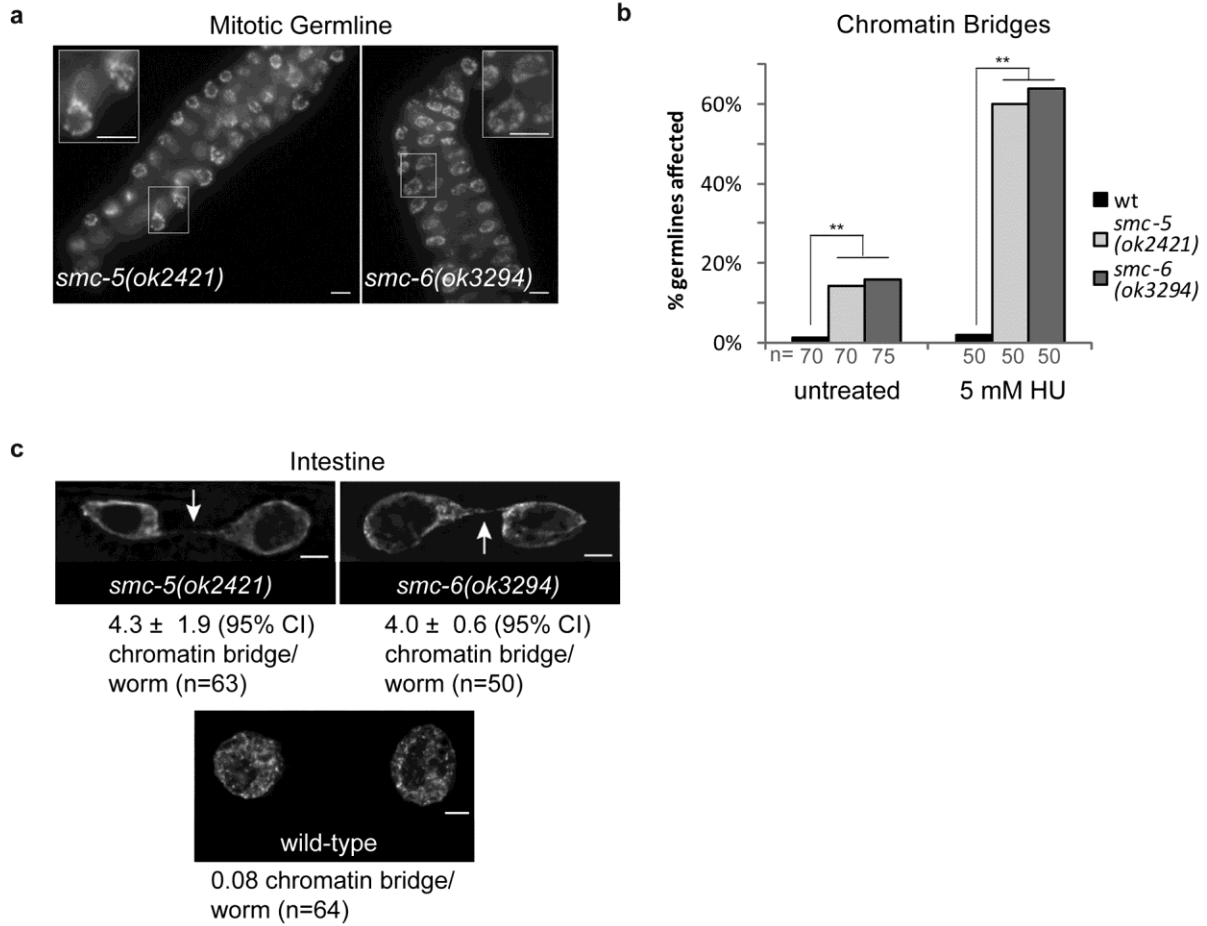

**Figure S3 Loss-of-function mutations in *smc-5* and *smc-6* confer a chromatin-bridging defect in the L4 larval germline.**

**a.** DAPI staining of dissected L4 larval germ cells. A magnified view of DNA bridges in the respective germline is depicted in the inset image. **b.** Graph showing the percentage of germlines containing one or more chromatin bridges for untreated and 5mM hydroxyurea (HU) treated L4 larvae. Double asterisks represent p value <0.01 in comparison to wild-type. Statistical analyses used the two-tailed Fisher's Exact Test comparing the total number of affected and unaffected germlines. **c.** DAPI staining of dissected adult intestine with quantification of chromatin bridges observed in *smc-5* and *smc-6* mutants compared to wild-type. Scale bars = 5  $\mu$ m.
