# Supplementary material
Source: PubMed Central journal article supplement (PMC3982690)
Supplement: 42781e3b733464cd9ed8b8462f165da4_genetics.113.158295-10.pdf [file 42781e3b733464cd9ed8b8462f165da4_genetics.113.158295-10.pdf]

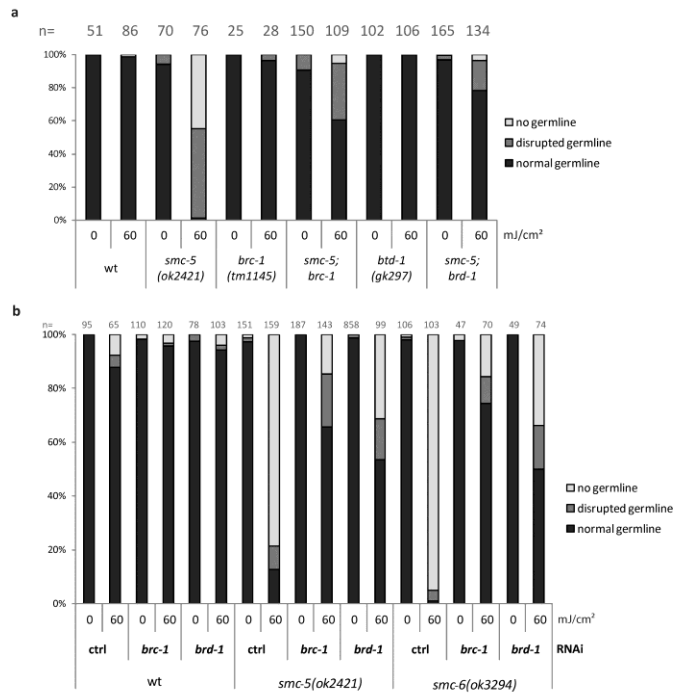

**Figure S9 *brd-1* and *brc-1* inactivation rescues UV hypersensitivity of *smc-5* and *smc-6* mutants.**

**a.** Quantification of germline development of worms three days after irradiation with UVB at L1 stage or untreated control worms. Worms were categorized into groups of ‘normal’, ‘disrupted’ and ‘no germline’ by inspection on a dissection microscope. **b.** L4 larvae were placed on the indicated RNAi bacteria and F1 generation was bleached. F2 worms were irradiated and raised on the same RNAi bacteria as the F1 was grown on. As read-out worms were categorized into groups of ‘normal’, ‘disrupted’ and ‘no germline’ by inspection on a dissection microscope. Graph shows germline development quantification of worms three days after irradiation with UVB at L1 stage or untreated control worms. n indicates number of animals assessed, representative experiment shown.
