# Supplementary material
Source: PubMed Central journal article supplement (PMC3982690)
Supplement: c2f05792ce7b2991fe3cf98acd3f7f18_genetics.113.158295-3.pdf [file c2f05792ce7b2991fe3cf98acd3f7f18_genetics.113.158295-3.pdf]

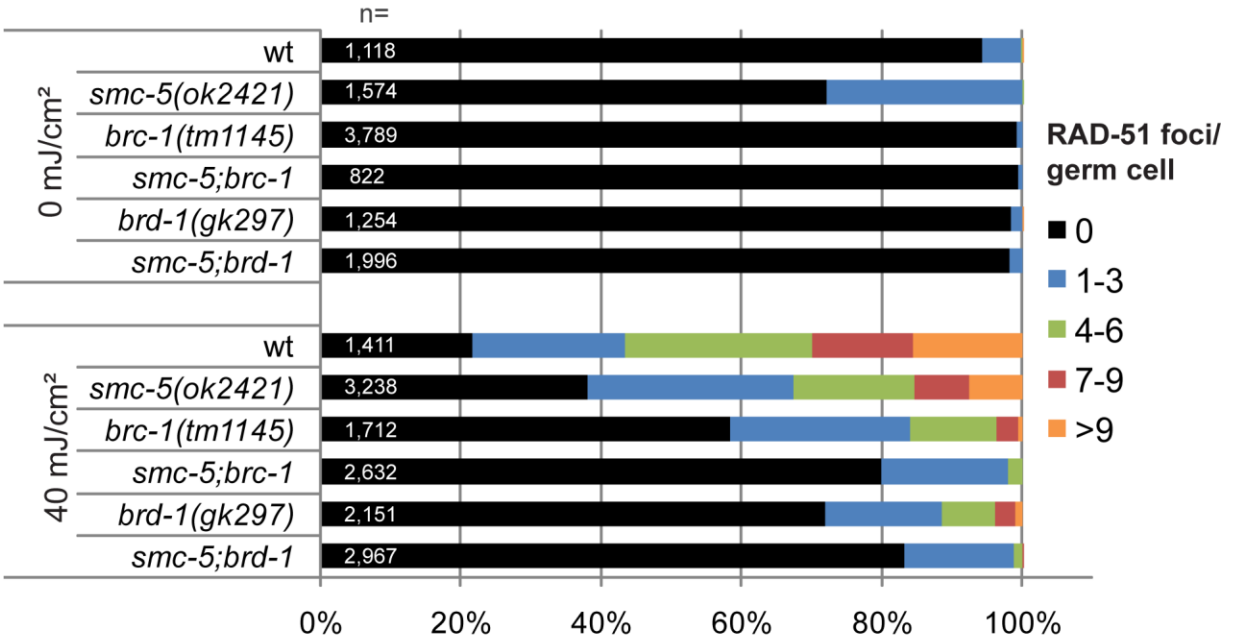

**Figure S10 Quantification of RAD-51 foci that are representatively shown in Figure 6A.**

Percentages of germ cells in L4 larval mitotic germline containing 0, 1-3, 4-6, 7-9, and more than 9 RAD-51 foci per nucleus. The number of germ cells quantified for each genotype is indicated at the base of the bars. The graph is based on  $\alpha$ RAD-51 and DAPI staining of dissected germlines.
