# Supplementary material
Source: PubMed Central journal article supplement (PMC3982690)
Supplement: ce832029f7b04417c7d7a3e37684c5ba_genetics.113.158295-13.pdf [file ce832029f7b04417c7d7a3e37684c5ba_genetics.113.158295-13.pdf]

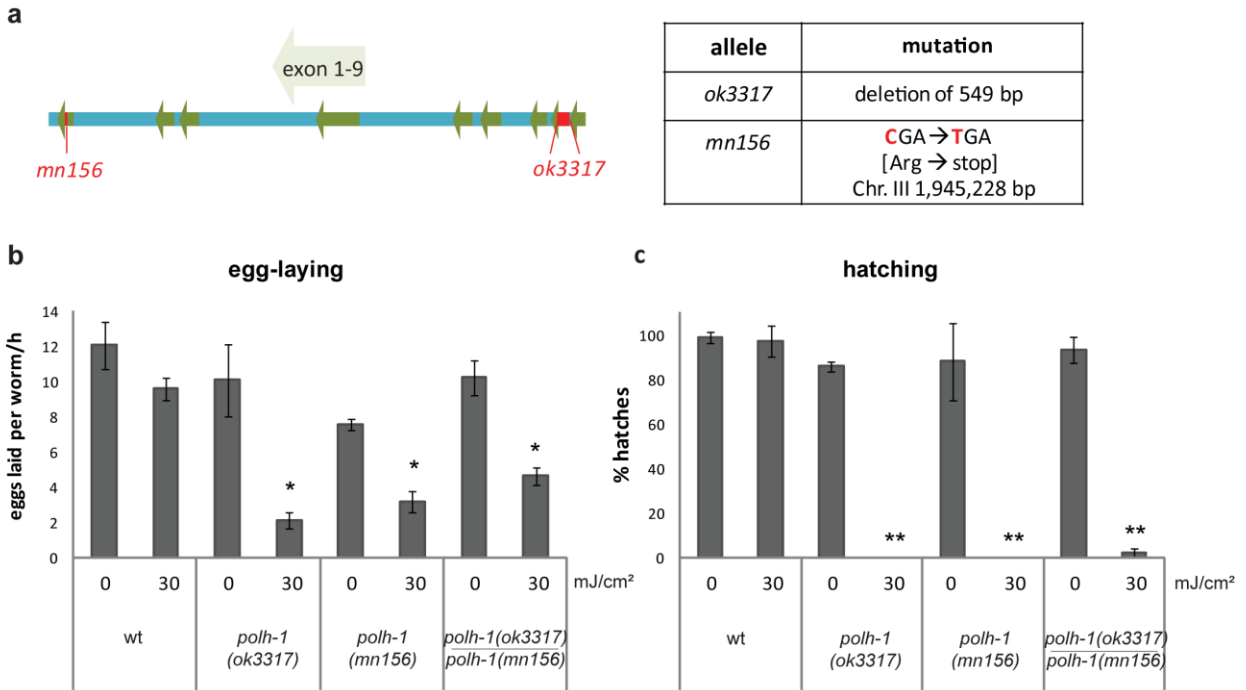

**Figure S5** *mn156* is a nonsense mutation in *polh-1*.

**a.** Genomic locus of *polh-1* (III: 1,945,111bp – 1,950,257bp) with exon location and annotation of *mn156* and *ok3317* alleles. **b.** Eggs laid 24h post irradiation at L4 stage. Shown are averages between three replicates of three worms. Error bars indicate standard deviation between the replicates. **c.** Percentage of hatches two days after egg-laying. Displayed are averages between three replicates of three worms. Error bars indicate standard deviation between the independent replicates.
