# Supplementary material
Source: PubMed Central journal article supplement (PMC3982690)
Supplement: f993f87df435e7fcc91ef282a7985ccc_genetics.113.158295-4.pdf [file f993f87df435e7fcc91ef282a7985ccc_genetics.113.158295-4.pdf]

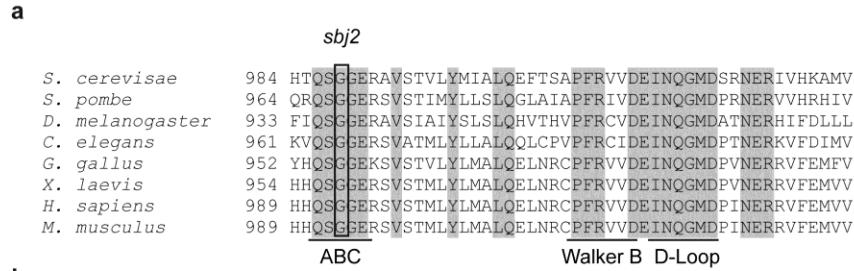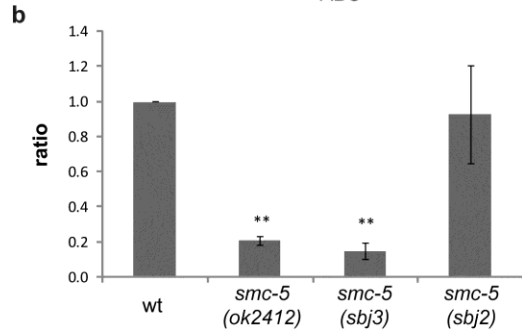

**Figure S1** *sbj2* allele of *smc-5* disrupts the ABC signature motif while *sbj3* and *ok2421* have reduced mRNA levels of *smc-5*. **a.** Alignment of carboxyl-terminal regions of SMC-5 homologs highlighting *sbj2* allele that changes a Glycine (G) of a conserved ABC signature motif into an Arginine (R). **b.** RT qPCR of *smc-5* using populations of mixed stages of the indicated genotypes. Error bars represent standard deviation between three biological replicates. *smc-5* mRNA levels were significantly reduced in *smc-5(ok2421)* and (*sbj3*) but not (*sbj2*) alleles. Double-asterisks (\*\*) denote p value >0.0001 calculated applying two-tailed students T-Test.
